# Supplementary material
Source: Springer Nature journal article supplement (https://www.springermedizin.de/resource/supplementary/12885_2011_2742_MOESM5_ESM.pdf/9461848)

### MCF-7

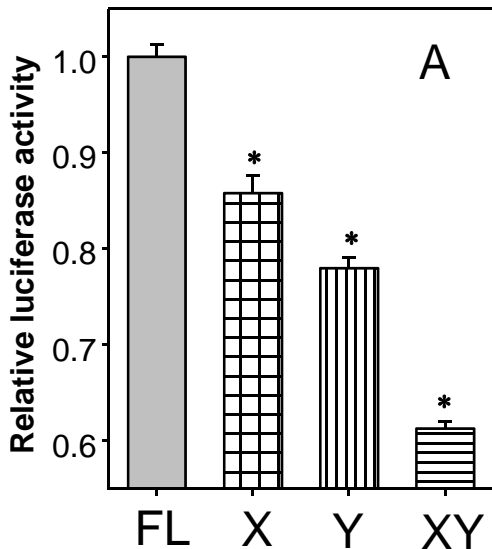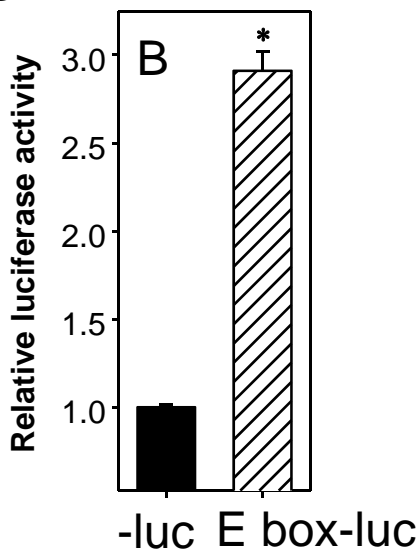

### MDA-MB-231

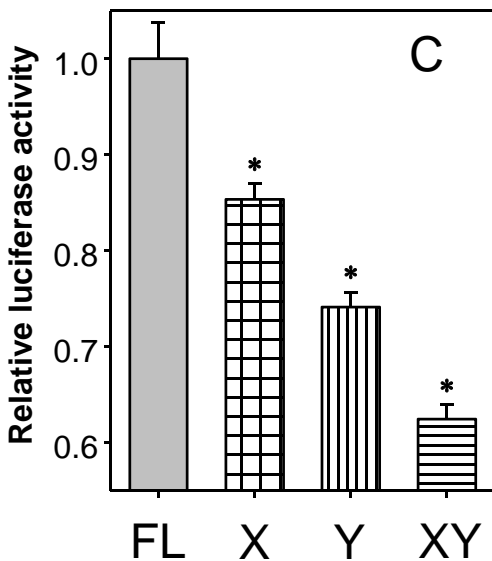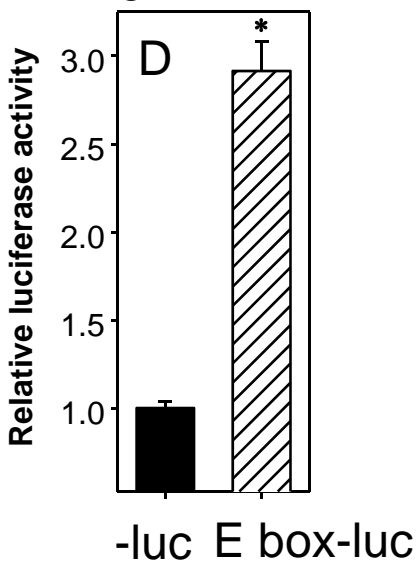

Supplement: MOESM5 [file 9461848]
